# Supplementary material for: Binational cohort study comparing the management and outcomes of pregnant women with a BMI >50–59.9 kg/m2 and those with a BMI ≥60 kg/m2
Source: PubMed Central journal article supplement (PMC6089316; doi:10.1136/bmjopen-2017-021055), 2018-08-10
Supplement: bmjopen-2017-021055supp001.pdf [file bmjopen-2017-021055supp001.pdf]

Supplementary table 1. Risk factors and administration of postnatal thromboprophylaxis in UK population: Green Top guideline no. 37a. Royal College of Obstetrics and Gynaecology

|                                           | Did not receive thromboprophylaxis |               | Received postnatal thromboprophylaxis |        |
|-------------------------------------------|------------------------------------|---------------|---------------------------------------|--------|
|                                           | n (%)                              |               | n (%)                                 |        |
| Only risk factor BMI $\geq 40$            | 7                                  | (4.2)         | 3                                     | (0.7)  |
| Two or more risk factors                  | 160                                | (95.8)        | 432                                   | (99.3) |
| Should have received thromboprophylaxis** | <b>167</b>                         | <b>(27.7)</b> | 435                                   | (72.2) |

\*These included: caesarean section, age  $\geq 35$ , infection, parity  $\geq 3$ , smoker, preeclampsia, caesarean section, multiple births and stillbirth (Other risk factors were in the RCOG guideline that were not available in this dataset).

\*\*Row percentage

Supplementary table 2. Administration for postnatal thromboprophylaxis and criteria for guideline in Australia

|                                            | Did not receive thromboprophylaxis |               | Received thromboprophylaxis |        |
|--------------------------------------------|------------------------------------|---------------|-----------------------------|--------|
|                                            | n (%)                              |               | n (%)                       |        |
| Meet the guideline criteria                | 109                                | (97.3)        | 192                         | (97.7) |
| Did not meet the guideline criteria        | 3                                  | (2.7)         | 4                           | (2.0)  |
| Should have received thromboprophylaxis*** | <b>109</b>                         | <b>(36.2)</b> | 192                         | (63.8) |

\*Major risk factors included: caesarean section, preeclampsia, infection and BMI  $\geq 35\text{kg/m}^2$

\*\*Minor risk factors included: Age  $> 35$  years, smoker, post-partum haemorrhage and parity  $\geq 3$  (Other risk factors were in the guideline that were not available in this dataset).

\*\*\*Row percentage

Summary for indication for post-partum prophylactic anticoagulation for South Australian Perinatal Practice Guidelines thromboprophylaxis and thromboembolic disease in pregnancy by South Australian Maternal & Neonatal Clinical Network

-Emergency caesarean section OR 2 or more major risk factors

-At least one major and 2 or more minor risk factors
